## **Is the predation risk of mate-searching different between the sexes?**

Viraj R. Torsekar\*, Kavita Isvaran, Rohini Balakrishnan

Centre for Ecological Sciences, Indian Institute of Science, Bangalore, India

\*Correspondence to [virajt@iisc.ac.in](mailto:virajt@iisc.ac.in) +919590927391; Lab TA-08, Centre for Ecological Sciences, Biological Sciences building, Indian Institute of Science, Bangalore, India

### **Running title**

Predation risk of mate searching

### **Keywords**

Communication, predation risk, signalling, mate searching, sex roles, crickets

### **Total word count**

5050 words

### **Number of figures and tables**

Number of table(s): 1

Number of figures: 4

## 1 **Abstract**

2 In animals that communicate for pair formation, generally one sex invests more effort  
3 in mate searching. Although searching by males is prevalent in most animals, in  
4 orthopteran insects and some other taxa females physically move to localise signalling  
5 males who are predominantly sedentary. Although the two sexes thus share mate  
6 searching effort in orthopterans, their behavioural strategies are different and sexual  
7 selection theory predicts that signalling males may be following the riskier strategy  
8 and incurring higher costs. However, relative levels of risk posed by the two mate  
9 searching strategies remain largely unexplored. Hence, we estimated the relative  
10 predation risk experienced in natural populations by signalling males and responding  
11 females. We did this by quantifying predation risk as a probability of mortality in the  
12 context of acoustic communication in a tree cricket, *Oecanthus henryi* from its  
13 ecologically relevant predator, a lynx spider, *Peucetia viridans*. Spiders may perceive  
14 calling in males and movement in females by their ability to detect both airborne  
15 acoustic cues and substrate-borne vibratory cues. Probability of mortality was  
16 quantified by partitioning it into three spatial components at which crickets and  
17 spiders interact, using a combination of extensive field observations and manipulative  
18 experiments in a semi-natural setup. We found no differences in predation risk faced  
19 by calling males and responding females, suggesting that direct benefits offered by  
20 males to females upon pair formation may better explain shared mate searching effort  
21 between the sexes in orthopterans.

22

23

## 24 **Introduction**

25 Searching for mates typically involves some physical activity for pair formation. Mate  
26 searching effort is defined “as a costly investment in traits that facilitate encounters  
27 with potential mates, including mobility, advertisement calls or displays, and  
28 pheromone production” (Fromhage et al. 2016). Several factors have been proposed  
29 to determine which of the two sexes contributes more towards mate searching  
30 (McCartney et al. 2012; Fromhage et al. 2016). However, sex differences in mate  
31 searching costs from predation risk, proposed as a potential determinant (Fromhage et  
32 al. 2016), has rarely been tested in natural populations (Heller 1992; Raghuram et al.  
33 2015).

34

35 Although mate searching by males is prevalent in most animals, in orthopterans and  
36 some other taxa females physically move to localise signalling males who are  
37 predominantly sedentary (Darwin 1871; Thornhill 1979). Thus, females share mate  
38 searching responsibilities, thereby exhibiting reduction in the asymmetry in mate  
39 searching between the sexes observed in most animal taxa. What factors explain  
40 females contributing towards pair formation and its maintenance? Thornhill (1979)  
41 attributes this to two potential factors: direct benefits provided by males to females on  
42 pair formation and/or the risks associated with signalling. In many species of  
43 orthoptera, on pair formation, males provide direct benefits such as a burrow for safe  
44 shelter (Gwynne 1995) or courtship nuptial gifts (Arnqvist and Nilsson 2000).  
45 McCartney et al. (2012) examined the interspecific mate searching differences across  
46 32 taxa from a katydid genus, using theory and observational data. Their findings  
47 provide comparative evidence for the hypothesis that mate searching by females can  
48 be explained by the direct benefits offered by males if these are substantial. The

49 alternative hypothesis states that since males benefit more from multiple mating, they  
50 should be selected to perform risky mate searching activities; hence, males are  
51 expected to face higher risks while signalling (Thornhill 1979; McCartney et al.  
52 2012). The relative risk of signalling versus responding has however rarely been  
53 tested.

54

55 Predation risk in the context of mate searching communication has predominantly  
56 been studied from the signaller's perspective (Zuk and Kolluru 1998). Many studies  
57 have demonstrated how sexual advertisement in the form of conspicuous calls makes  
58 signallers vulnerable to predation (Walker 1964; Bell 1979; Ryan et al. 1982;  
59 Belwood and Morris 1987; reviewed in Zuk and Kolluru 1998). However, studies  
60 analysing predator diet found evidence for responding females being at an equal, if  
61 not higher predation risk, in comparison with signalling males (Heller and Arlettaz  
62 1994; Raghuram et al. 2015). Thus, both signalling and responding to signals entail  
63 predation risk, since signalling attracts eavesdropping predators (Zuk and Kolluru  
64 1998) and movement towards a signal increases exposure to predators (Gwynne 1987;  
65 Heller and Arlettaz 1994; Raghuram et al. 2015). There is however, a paucity of  
66 studies that attempt to estimate the relative predation risk of signallers and responders  
67 (but see Heller 1992; Raghuram et al. 2015).

68

69 We examined the mate searching costs from predation risk in tree crickets by  
70 estimating predation risk experienced by calling males and responding females. For  
71 determining the intensity of selection due to predation on particular behaviours, the  
72 number of crickets captured by predators while exhibiting those behaviours of interest  
73 need to be quantified. We studied predation risk using an approach novel to the field

74 of communication, though commonly used in ecology (Holling 1959; Lima and Dill  
75 1990; Hebblewhite et al. 2005; Brechbühl et al. 2011). We defined the risk of  
76 predation “as the probability of being killed” while exhibiting the strategy of calling  
77 by males and responding to calls by females (Lima and Dill 1990). We partitioned  
78 risk into constituent parts, each characterised by a discrete spatial scale at which  
79 predator and prey interact: co-occurrence (spatial overlap from which predator and  
80 prey can potentially perceive each other), encounter (spatial proximity from which  
81 predators can potentially attack prey) and being eaten (the behavioural outcome once  
82 the predator attacks prey). At each scale, the binary response of prey either  
83 succeeding or failing to avoid the predator helped estimate probabilities. Predation  
84 risk was estimated as a product of these probabilities (represented in Fig. 1). Such a  
85 comprehensive approach is critical to determine any trade-offs across different scales  
86 that might not reflect in the total predation risk if studied only at the scale of  
87 proportion of sexes in predator diets, predator visitations in playback experiments, or  
88 predator preferences of certain prey behaviours in a controlled environment (Tuttle  
89 and Ryan 1981, Heller and Arlettaz 1994, Alem et al. 2011). Furthermore, quantifying  
90 predator visits and/or predator preference towards calling males and responding  
91 females and equating this pattern with the pattern in the intensity of selection assumes  
92 that both those encounters happen with the same frequency in the wild. Hence, we  
93 formally estimated the probability of these encounters in the field, in addition to the  
94 respective capture probabilities, and multiplied them in order to estimate predation  
95 risk.

96

97 We tested the expectation that calling by males is more risky than responding to calls  
98 by females in a tree cricket species where both males and females share mate

99 searching responsibilities. We did so by estimating predation risk as a probability of  
100 mortality experienced by male tree crickets when they were calling and female  
101 crickets when they were responding to calls from their main predators, green lynx  
102 spiders.

103

## 104 **Methods**

105 We carried out our study on a tree cricket species, *Oecanthus henryi* whose main  
106 predator is the green lynx spider, *Peucetia viridans*. *Oecanthus henryi* is found  
107 extensively in the dry scrubland of southern India, predominantly on bushes of *Hyptis*  
108 *suaveolens*. *Oecanthus* species exhibit a mating system typical of true crickets  
109 (Gryllidae), where the males produce a long-range species-specific call and females  
110 do not call, but detect, recognize and locate males of their species (Walker 1957).  
111 Males of *O. henryi* typically call from *H. suaveolens* leaves and the females negotiate  
112 the complex architecture of the bushes and approach the calling males (Bhattacharya  
113 2016). *Oecanthus henryi* male calls are made up of rhythmic chirps (Metrani and  
114 Balakrishnan 2005). *Peucetia viridans* (family Oxyopidae) is commonly observed on  
115 *Hyptis suaveolens* bushes and has been observed preying upon tree crickets and  
116 honeybees (VRT and RB, personal observations). Spiders perceive acoustic signals  
117 (Lohrey et al. 2009) as both airborne acoustic cues (Shamble et al. 2018) and  
118 substrate-borne vibratory cues (Barth 2002) most likely detected by the air-flow-  
119 sensitive hairs present in abundance on spider bodies. Similarly, spiders may perceive  
120 locomoting females using the vibratory cues produced by females while moving on  
121 bush branches.

122

123 All field surveys, sampling sessions and experiments were carried out in a  
124 homogenous patch of *H. suaveolens* on unused farmland, near Ullodu village  
125 (13°38'27.2"N 77°42'01.1"E) in Chikkaballapur district of Karnataka state in southern  
126 India. Laboratory experiments were performed on the campus of the Indian Institute  
127 of Science, Bangalore. All experiments in semi-natural conditions were carried out in  
128 an outdoor enclosure, constructed with a steel frame of dimensions 6m x 6m x 3m and  
129 fastened with a fibre mosquito mesh (mesh size: 0.1cm x 0.2 cm), on the campus of  
130 Indian Institute of Science, Bangalore.

131

132 We estimated predation risk as a product of three probabilities: 1) probability of co-  
133 occurrence of *O. henryi* and *P. viridans* on a bush (POC), 2) probability of *O. henryi*  
134 encountering *P. viridans*, given their co-occurrence (POE), and 3) probability of *O.*  
135 *henryi* being eaten by *P. viridans*, given an encounter (POBE).

136

137 Predation risk = POC x POE x POBE

138

139 The study was carried out in four parts. First, we performed extensive sampling to  
140 investigate who the main predators of *O. henryi* were in the field. Second, we sampled  
141 a population of *O. henryi* in the field to estimate the probability with which they co-  
142 occur with their main predator species, considering a single *H. suaveolens* bush as a  
143 unit (POC). Then we conducted two experiments in a semi-natural outdoor enclosure  
144 to obtain the probability of encounter between *O. henryi* and *P. viridans* when both  
145 co-occurred on the same bush (POE), and the probability with which *O. henryi* are  
146 eaten by *P. viridans* upon encounter (POBE, represented in Fig. 1). The sampling and

147 experiments to measure the probabilities were carried out on two different treatment  
148 regimes: calling males and responding females of *O. henryi*.

149

### 150 *Predator sampling*

151 Not much is known about the identity of predators of *Oecanthus* species (Ponce-  
152 Wainer and Del Castillo 2008, but see O'Neill and O'Neill 2003, Ercit 2013). We  
153 conducted a series of experiments and sampling sessions to elucidate the predators of  
154 *O. henryi*. Playback experiments were carried out in the field to determine  
155 acoustically orienting aerial predators of *O. henryi*. Visitations by aerial predators  
156 were compared at speakers playing back *O. henryi* calls with paired silent speakers  
157 for a total of 40 hours (experimental details in supplementary information section S  
158 1). For discovering arboreal predators of *O. henryi*, relative abundance sampling  
159 sessions and predation experiments were carried out. The extensive relative  
160 abundance sampling helped determine who the potential predators of *O. henryi* were  
161 (sampling details in supplementary information section S 2.1). To establish whether  
162 these potential predators are real predators, detailed predation experiments were  
163 conducted in the field (details in supplementary information section S 2.2 and S 2.3).  
164 Experiments were also conducted to understand how starvation period of the predator  
165 affects predation so as to better design further experiments (experimental details in  
166 supplementary information section S 2.4).

167

### 168 *Probability of co-occurrence*

169 To determine the probability of co-occurrence between *O. henryi* and its main  
170 predator *P. viridans*, incidences of *O. henryi* co-occurring with large *P. viridans*  
171 (body size larger than 5.12 mm; for details refer to results section and supplementary



172 information section S 2.2) on the same bush were recorded in the field between  
173 November and May. Between 1900hrs and 2115hrs, calling males were located using  
174 their calls, whereas females were localized using 5x5m quadrat sampling or  
175 opportunistically. These plots were chosen by dividing the whole field into 5x5 m  
176 plots and randomly selecting from them. The field was made up mostly of *Hyptis*  
177 *suaveolens* bushes. Once a quadrat was chosen, all bushes in it were sampled for the  
178 presence of female crickets. Once localized, these crickets, both males and females,  
179 were focally sampled for at least 30 minutes. This time was allocated mainly for  
180 males to call, to help distinguish callers from non-callers. The bush or bushes, on  
181 which these crickets were observed while sampling, were thoroughly searched for the  
182 presence of *P. viridans* at the end of the sampling session. If a spider was present,  
183 distances between the cricket and the spider and whether they were present on the  
184 same or different branches was recorded, along with the height and distance of the  
185 spider from the centre of the bush. Post sampling, crickets and spiders were collected  
186 and brought back to the field station for marking and sizing, respectively. Crickets  
187 were marked with a unique tricolour code using nontoxic paint markers (Edding 780,  
188 Edding, St Albans, U.K.), to avoid resampling; spiders were sized to confirm their  
189 ability to predate on crickets (body size larger than 5.12 mm; for details refer to  
190 results section and supplementary information section S 2.2), and both were released  
191 back into the field. Male *O. henryi* were considered as callers based on whether or not  
192 they called more than 20% of the time they were observed. 20% of the calling effort  
193 was chosen as a cut-off so as to avoid choosing infrequent signallers as callers. Since  
194 there was no intuitive way to categorise communicating and non-communicating  
195 females during field observations, observed females were randomly classified as  
196 responding and non-responding based on a supplementary experiment (that estimated

197 the relative frequency of communicating, or phonotactic, females in the same  
198 population). This random sampling involved computationally segregating (sampled  
199 for 10,000 iterations) the observed females into responding and non-responding  
200 females, using the proportion of wild-caught females known to be responsive (0.3;  
201 experimental details in supplementary information section S 3).

202

### 203 *Probability of encounter given co-occurrence*

204 To determine the probability of encounter between *O. henryi* and *P. viridans* given  
205 their co-occurrence on a bush, experiments were carried out in semi-natural  
206 conditions, inside a large outdoor enclosure. Crickets and spiders were collected from  
207 wild populations from in and around Peresandra, Karnataka, India (13°35'25.3"N  
208 77°46'50.4"E), a few days before the experiment. Crickets were maintained on *H.*  
209 *suaveolens* bushes and spiders were provided *Gryllus bimaculatus* nymphs 2-3 times  
210 a week, both in the laboratory. Female crickets were collected as nymphs from the  
211 field and fed on an apple diet till they eclosed into adults after which they were  
212 maintained on *H. suaveolens* bushes. This exercise ensured virginity of all tested  
213 females, which increases the propensity of females to perform phonotaxis. Male and  
214 female crickets were maintained separately. Spiders were maintained in individual  
215 plastic boxes (6 cm diameter, 4 cm height). Spiders were starved for 48 hours prior to  
216 a trial and crickets were transferred to *H. suaveolens* bushes in outdoor cages at least  
217 a day before a trial to acclimatise them. No cricket was repeated across or within  
218 treatments and no spiders were repeated within treatments.

219

220 Each trial involved releasing one cricket and one spider on a *H. suaveolens* bush.  
221 Crickets were released on bushes at least 4 hours before the trial was started. The

222 spiders were released at 1900 hours, marking the beginning of a trial. They were  
223 released on the bush at a height and distance from its centre, picked randomly from  
224 the interquartile range of their respective uniform distributions that were obtained  
225 from field data (height range on the bush for male crickets: 29 to 51 cm; for female  
226 crickets: 27 to 56 cm; for spiders on bushes with male crickets: 36 to 67 cm; for  
227 spiders on bushes with female crickets: 19 to 50 cm; Distance from centre of bush for  
228 male crickets: 12 to 24 cm; for female crickets: 11 to 29 cm; for spiders on bushes  
229 with male crickets: 11 to 22 cm; for spiders on bushes with female crickets: 12 to 21  
230 cm). Spiders were released on either the same or on a different branch as the cricket at  
231 1900 hours with the proportion with which they were observed in the field (0.154 of  
232 all co-occurrences between crickets and spiders in field were on the same branch for  
233 calling males, and 0.286 for responding females). On the same or different branch, the  
234 distance at which spiders were released from crickets was drawn randomly from the  
235 interquartile range of a uniform distribution of distances at which crickets and spiders  
236 were observed in the field (distance between spider and male cricket on same branch:  
237 7 to 9 cm; on different branch: 23 to 40 cm; distance between spider and female  
238 cricket on same branch: 10 to 15 cm; on different branch: 19 to 38 cm). Once the  
239 spider was released at 1900 hours, the interaction between the cricket and spider was  
240 observed for about 120 minutes by scan sampling each individual alternately every 30  
241 seconds. An encounter was defined as any spatial proximity between the cricket and  
242 spider, within 4 cm of each other, on the same branch, that includes spiders capturing  
243 crickets, spiders unsuccessfully attacking crickets or either spider or cricket moving  
244 away without spiders attacking (Table S1 in supplementary information). This  
245 distance was the outer range from which *P. viridans* attacked *O. henryi* and also the

246 distance at which the cricket could potentially antennate the spider (VRT, personal  
247 observations).

248

249 Any male that called for more than 20% of the time it was observed was classified as  
250 a calling male. Females were played back conspecific male calls from a speaker (X-  
251 mini Capsule Speaker V1.1, Xmi Pte Ltd, Singapore) placed 60 cm away, across the  
252 bush from the female's position at 1900 hrs. A trial was considered only if the female  
253 performed phonotaxis and reached within 20 cm of the speaker. The speaker was  
254 fixed on a stand, which was adjusted to the median height at which calling males were  
255 observed in the field (42 cm). The SPL of each call broadcast from the speaker was  
256 adjusted to be 61 dB (r.m.s. re.  $2 \times 10^{-5} \text{ Nm}^{-2}$ ) at the female's location with the help of  
257 a 1/2" microphone (Brüel and Kjær A/S, Denmark, Type 4189, 20 Hz to 20 kHz) fitted  
258 on a Sound Level Meter Type 2250 (Brüel and Kjær A/S, Denmark). Since the call  
259 carrier frequency changes with temperature in *O. henryi*, the choice of call to be  
260 played back was based on the temperature recorded at 1900 hours every evening. The  
261 call was chosen from among 3 representative calls that were recorded at 22°C, 24°C  
262 and 26°C (calls recorded by Rittik Deb, Deb 2015), whichever was closest to the  
263 recorded temperature. This call was played back in a loop using Audition software  
264 (Adobe, Version 5.0.2) on a MacBook Pro (2011) laptop using X-mini (Capsule  
265 Speaker V1.1, Xmi Pte Ltd, Singapore) speakers, for the entire duration of the  
266 experiment.

267

### 268 *Probability of being eaten given encounter*

269 The probability of *O. henryi* being eaten by *P. viridans* once encounter occurs was  
270 examined empirically in the same outdoor semi-natural setup. *O. henryi* and *P.*

271 *viridans* were collected and maintained using the same protocol mentioned in the  
272 earlier section. The same two treatments were maintained for this experiment.  
273 Crickets were released at least 4 hours before the commencement of the experiment at  
274 1900 hours on the bush at a height and distance from its centre as explained in the last  
275 experiment. From 1900 hours onwards, focal observations were made for at least 45  
276 minutes to allow males to call and to allow females to perform phonotaxis. Following  
277 these observations and based on whether the male called and female performed  
278 phonotaxis, a spider was gently released within close proximity of the cricket, not  
279 more than 6 cm away from it, using a *H. suaveolens* stick. A trial was considered only  
280 if the spider attacked, which was confirmed by videotaping all interactions. A spider  
281 capturing the cricket was scored as the cricket being eaten by the spider.

282

### 283 *Analyses*

284 Since comparing estimates of rare and non-normally distributed events can be  
285 challenging, we employed non-parametric bootstrapping and permutation tests  
286 (Manly 2006). These are robust methods for obtaining confidence intervals and *P*-  
287 values, respectively, since they make few assumptions about the underlying  
288 distributions (Manly 2006; Nakagawa and Cuthill 2007). Bootstrapping was used to  
289 generate 95% confidence intervals around each probability. This process involved  
290 sampling with replacement, for 10,000 iterations, from the original vector of success/  
291 failures used to calculate the probability. Overlap in confidence intervals was used to  
292 infer statistical significance for each relevant comparison (Cumming and Finch 2005).  
293 Additionally, permutation tests were carried out to assess statistical significance  
294 (Manly 2006). We used software R, Version 3.3.3 (R Core Team 2017) to run all  
295 analyses, and the 'ggplot2' package (Wickham 2009) to plot all graphics.

296

## 297 **Results**

### 298 *Predator sampling*

299 Playback experiments were carried out in the field to observe if there are any  
300 acoustically orienting aerial predators of *O. henryi*. Bats (species unknown) flew past  
301 the playback speaker on 4 separate occasions, and past the control speaker on 5  
302 occasions out of a total of 40 hours of observation. Approaches to both speakers by  
303 bats was very similar (4 and 5 times in 40 hours, respectively). Also, a praying mantis  
304 approached a broadcast speaker once. In relative abundance sampling to investigate  
305 arboreal predators, 15 5x5m plots were sampled, amounting to 1083 bushes. A total  
306 of 127 *P. viridans* individuals, 129 spiders belonging to the web-building guild, and 1  
307 praying mantis were observed, along with many beetles, roaches, termites and moths  
308 which were not enumerated since they are not potential predators of tree crickets. Of  
309 these, *P. viridans* and spiders belonging to the web-building guild were categorized as  
310 potential predators. In the field predation experiment, 16 out of 30 *P. viridans* that  
311 were offered *O. henryi*, captured and consumed them. Mean size of *P. viridans* that  
312 successfully predated on *O. henryi* was 9.12 mm (n=16) and the mean size of those  
313 that did not predate was 4.22 mm (n=14), and they were significantly different  
314 (Randomisation test,  $P < 0.001$ ). All *P. viridans* that captured *O. henryi* were larger  
315 than 5.12 mm in body length (n=16) (Fig. 2). In similar sets of experiments, spiders  
316 belonging to the web-building guild, were found not to be main predators of *O. henryi*  
317 (details in supplementary information section 2.3).

318

### 319 *Probability of co-occurrence*

320 The probability with which crickets co-occur with large spiders was similar between  
321 calling males and responding females ( $P = 0.779$ ; Table 1, Fig. 3a). These results did  
322 not qualitatively change when all sampled females ( $n = 43$ ) were considered instead  
323 of only the randomly sampled segregate classified as responding females ( $P = 0.790$ ).

324

### 325 *Probability of encounter given co-occurrence*

326 Once co-occurring on the same bush, both calling males and responding females  
327 encountered spiders with the same probability ( $P = 0.221$ ; Table 1, Fig. 3b).

328

### 329 *Probability of being eaten given encounter*

330 When an encounter was forced between the spiders and crickets, relatively few  
331 individuals, whether calling males or responding females were captured and eaten by  
332 *P. viridans* (Table 1). Thus, on encounter, the probability of being eaten by the spider  
333 is similar for both ( $P = >0.999$ ; Table 1, Fig. 3c). The probability of being eaten is  
334 much lower in this experiment compared to the field predation experiment performed  
335 to establish *P. viridans* as the real predator because the field predation experiment  
336 was conducted inside plastic boxes, in a restricted space, where crickets could not  
337 escape, unlike when on the bush.

338

### 339 *Predation risk*

340 The product of these probabilities (POC x POE x POBE i.e. product of co-occurrence,  
341 encounter and capture probabilities), the predation risk, is also similar between calling  
342 males and responding females (calling males = 0.0 vs. responding females = 0.0033;  
343  $P = 0.558$ ; Table 1, Fig. 4).

344

345 **Discussion**

346 Our study investigated the relative predation risk of communicating individuals,  
347 signallers and responders, in natural populations on a within-night time scale.  
348 Observing interactions at various spatial scales allowed a comprehensive  
349 quantification of predation risk by taking into account predator-prey dynamics. Our  
350 choice of predator was justified using extensive field surveys and acoustic sampling  
351 sessions to determine all potential predators and carefully pruning that list using  
352 predation experiments to select a predator that is ecologically relevant to our system  
353 of choice. We found that the green lynx spider *P. viridans* was the main predator of  
354 *O. henryi*. Spiders have been observed to be predators of several species of crickets  
355 (Hedrick and Kortet 2006; Dangles et al. 2006; Storm and Lima 2010). Spiders are  
356 sensitive to both long-range acoustic (Shamble et al. 2016) and substrate-borne  
357 vibratory cues (Barth 2002). Such multimodal sensitivity could allow them to  
358 perceive both acoustic calls and locomotory cues, making spiders good model  
359 predators for studying costs of communication that involves calling by males, and  
360 movement by females.

361

362 Predation risk of calling in males and responding to calls in females was similar  
363 across all spatial scales relevant to predator-prey dynamics. We examined and  
364 compared the probability of communicating male and female crickets co-occurring on  
365 bushes with spiders. This probability was similar, indicating that risk faced from  
366 distribution of spiders at a broad-scale is not influenced by whether the cricket is a  
367 signalling male or a responding female. These females were classified as responding  
368 females based on random sampling of wild females using limited information and a  
369 future step would be to compare the co-occurrence patterns of communicating and



370 non-communicating females. Based on the smaller sample size of wild females tested  
371 for motivation, anecdotal observations suggest that the co-occurrence of  
372 communicating and non-communicating individuals is not very different. While co-  
373 occurring on the same bush, the probability of encountering a spider was similar  
374 between the predominantly sedentary calling males and mostly mobile responding  
375 females. A possible explanation for this result is that communicating individuals are  
376 taking similar necessary evasive measures to spatially avoid predators (reviewed in  
377 Sih 2005). It will be interesting to investigate whether the two sexes spatially avoid  
378 predators while communicating. In addition, we investigated the probability with  
379 which crickets were captured by spiders when attacked and found no differences. This  
380 probability was extremely low for both sexes in comparison with the earlier two  
381 probabilities. This result is not unexpected since crickets are known to have high  
382 escape success against spider attacks, attributable to their air-sensing systems  
383 (Dangles et al. 2006). Although probability of calling males being eaten by spiders  
384 was zero, it was statistically similar to the non-zero probability of responding females.  
385 Since almost certainly the probability of calling males being captured by spiders in  
386 nature is not zero, this probability was interpreted as being very low. Finally, the  
387 resultant product of the three probabilities, considered as predation risk, was similar  
388 for calling males and responding females, suggesting the cost from predation was  
389 comparable for mate searching male and female crickets. Also, this probability was  
390 extremely low for the two sexes, primarily due to high escape probabilities exhibited  
391 by crickets when attacked by spiders.

392

393 We tested the predictions of one of the two factors proposed to explain females  
394 sharing mate searching responsibilities with males in long distance signalling taxa:

395 high risk of signalling (Thornhill 1979). Risk associated with signalling has been  
396 shown in several taxa in which males signal for mate searching (Walker 1964, Bell  
397 1979, Ryan et al. 1982, Belwood and Morris 1987, reviewed in Zuk and Kolluru  
398 1998). We suggest that studies testing this hypothesis should not only provide  
399 evidence that the risk is high for signalling males, but also that this risk is higher than  
400 that for responding females. Very few studies have estimated risk of signalling in  
401 comparison with searching. Our findings, in corroboration with two other studies  
402 (Heller 1992, Raghuram et al. 2014), are not consistent with the prediction that males  
403 are selected to perform the more risky mate searching activity. The hypothesis that  
404 direct benefits offered by males drives evolution of female mate searching was  
405 however supported by theoretical and observational results in katydids (McCartney et  
406 al. 2012). In addition, courtship feeding as observed in *Oecanthus* species (Houghton  
407 1909; Fulton 1915), has been shown to be an ancestral trait in the orthopteran  
408 suborder Ensifera, suggesting that males of most Ensiferan genera will offer direct  
409 benefits to their female counterparts on pair formation (Gwynne 1997). Furthermore,  
410 direct benefits offered by males might offset the costs females experience while  
411 responding to signals that are generated by sedentary males. Since males are expected  
412 to benefit from multiple matings and females from direct benefits, the costs can also  
413 be expected to be shared between the sexes, a potential outcome supported by our  
414 results. Hence, females contributing towards mate searching efforts in orthopterans  
415 can perhaps be better explained by provision of resources by males to females rather  
416 than invoking higher risk of signalling.

417

418 In conclusion, although predation risk of signalling in males has been considered to  
419 be high (Zuk and Kolluru 1998), when compared with risk of responding, our findings

420 show these risks to be similar. It is only by addressing predation risk between the  
421 communicating sexes across several relevant spatial scales that we could compare  
422 risks faced by the two mate searching strategies. More comparative studies on  
423 different species on predation associated costs between the mate searching sexes  
424 would help update our understanding of whether at all there are systematic cost  
425 differences in mate searching strategies. Finally, we also show that overall predation  
426 costs of communication per night are low and that a predation event is very rare,  
427 which raises questions on the importance of predation as a major selection pressure on  
428 the evolution of communication.

429

### 430 **Author contributions**

431 VRT participated in conceptualising and designing the study, carried out data  
432 collection and analysis and wrote the manuscript. KI contributed to data analysis,  
433 interpretation and writing the manuscript. RB contributed to conceptualising and  
434 designing the study, interpretation of data and writing the manuscript.

435

### 436 **Acknowledgements**

437 We thank the DBT-IISc partnership programme (2012-2017) of the Department of  
438 Biotechnology, Government of India for funding the fieldwork and Ministry of  
439 Human Resource Development, Government of India for funding the research  
440 fellowship of VRT. We thank the DST-FIST program of the Govt. of India for some  
441 of the equipment used in the study. We thank Diptarup Nandi, Rittik Deb and  
442 Monisha Bhattacharya for helpful discussions and Diptarup Nandi for comments on  
443 the manuscript. We thank Mr. B. Sridhar (Garden and Nursery Technical Officer) and  
444 Nursery staff for their support. We would like to thank Ayan, Babu, Chaithra, Chirag,

445 Dakshin, Girish, Himamshu, Harsha, Ismail, Lakshmipriya, Manoj, Meenakshi,  
446 Meghana, Murthy, Shivaraju, Sidanth, Sonu, Sriniketh, Srinivasan, Sunaina and  
447 Vinayaka for their help in making behavioural observations and Manjunatha Reddy  
448 for his assistance in fieldwork.

449

#### 450 **Conflict of Interest**

451 The authors declare that they have no conflict of interest.

452

#### 453 **Ethics statement**

454 All behavioural data sampling and experiments were performed in accordance with  
455 the national guidelines for the ethical treatment of animals laid out by the National  
456 Biodiversity Authority (Government of India).

457

458 **References**

- 459 Alem S, Koselj K, Siemers BM, Greenfield MD (2011) Bat predation and the  
460 evolution of leks in acoustic moths. *Behav Ecol Sociobiol* 65:2105–2116
- 461 Andersson MB (1994) *Sexual selection*, Princeton University Press, Princeton
- 462 Arnqvist G, Nilsson T (2000) The evolution of polyandry: multiple mating and female  
463 fitness in insects. *Anim Behav* 60:145–164
- 464 Balakrishnan R (2016) Behavioral ecology of insect acoustic communication. In:  
465 Pollack GS, Mason AC, Popper AN, Fay RR (eds) *Insect hearing*. Springer  
466 International Publishing, Switzerland, pp 49–80
- 467 Barth FG, (2002) *A spider's world: senses and behavior*. Springer-Verlag, New York
- 468 Bateman AJ (1948) Intra-sexual selection in *Drosophila*. *Heredity* 2:349–368
- 469 Bell PD (1979) Acoustic attraction of herons by crickets. *J N Y Entomol Soc* 87:126–  
470 127
- 471 Belwood JJ, Morris GK (1987) Bat predation and its influence on calling behavior in  
472 neotropical katydids. *Science* 238:64–67
- 473 Bhattacharya M (2016) Investigating pattern recognition and bi-coordinate sound  
474 localization in the tree cricket species. PhD dissertation, Centre for Ecological  
475 Sciences, Indian Institute of Science, Bangalore, India.
- 476 Brechbühl R, Casas J, Bacher S (2011) Diet choice of a predator in the wild:  
477 overabundance of prey and missed opportunities along the prey capture sequence.  
478 *Ecosphere* 2:1-15

- 479 Byers J, Dunn S (2012) Bateman in nature: predation on offspring reduces the  
480 potential for sexual selection. *Science* 338:802–804
- 481 Core Team R (2017) A language and environment for statistical computing. R  
482 Foundation for Statistical Computing. <http://www.R-project.org>.
- 483 Cumming G, Finch S (2005) Inference by eye: confidence intervals and how to read  
484 pictures of data. *Am Psychol* 60:170–180
- 485 Darwin C (1871) *The descent of man and selection in relation to sex*. John Murray,  
486 London, UK
- 487 Dangles O, Ory N, Steinmann T, Christides JP, Casas J (2006) Spider's attack versus  
488 cricket's escape: velocity modes determine success. *Anim Behav* 72:603–610
- 489 Deb R (2015) *Mate choice, mate sampling and baffling behaviour in the tree cricket*.  
490 PhD dissertation, Centre for Ecological Sciences, Indian Institute of Science,  
491 Bangalore, India.
- 492 Ercit K (2013) Size and sex of cricket prey predict capture by a sphecid wasp. *Ecol*  
493 *Entomol* 39:195-202
- 494 Fromhage L, Jennions MD, Kokko H (2016) The evolution of sex roles in mate  
495 searching. *Evolution* 70:617-624
- 496 Fulton BB (1915) *The tree crickets of New York: life history and bionomics*. N Y  
497 Agric Exp Station Tech Bull 42:1–47
- 498 Gwynne DT (1987) Sex-biased predation and the risky mate-locating behaviour of  
499 male tick-tock cicadas (Homoptera: Cicadidae). *Anim Behav* 35:571–576

- 500 Gwynne DT (1995) Phylogeny of the Ensifera (Orthoptera): A hypothesis supporting  
501 multiple origins of acoustical signalling, complex spermatophores and maternal  
502 care in crickets, katydids, and weta. *J Orthop Res* 4:203–218
- 503 Gwynne DT (1997) The evolution of edible ‘sperm sacs’ and other forms of courtship  
504 feeding in crickets, katydids and their kin (Orthoptera: Ensifera). In: Choe JC and  
505 Crespi BJ (eds) *The evolution of mating systems in insects and arachnids*.  
506 Cambridge University Press, Cambridge, UK, pp 110–129
- 507 Hammerstein P, Parker GA (1987) Sexual selection: games between the sexes. In:  
508 Bradbury JW, Andersson MB (eds) *Sexual selection: testing the alternatives*. John  
509 Wiley & Sons, Chichester, UK, pp 119–142
- 510 Hebblewhite M, Merrill EH, McDonald TL (2005) Spatial decomposition of  
511 predation risk using resource selection functions: an example in a wolf–elk  
512 predator–prey system. *Oikos* 111:101–111
- 513 Hedrick AV, Kortet R (2006) Hiding behaviour in two cricket populations that differ  
514 in predation pressure. *Anim Behav* 72: 1111–1118
- 515 Heller KG (1992) Risk shift between males and females in the pair-forming behavior  
516 of bushcrickets. *Naturwissenschaften* 79:89–91
- 517 Heller KG, Arlettaz R (1994) Is there a sex ratio bias in the bushcricket prey of the  
518 scops owl due to predation on calling males? *J Orthop Res* 2:41–42
- 519 Holling CS (1959) The components of predation as revealed by a study of small-  
520 mammal predation of the European Pine Sawfly. *Can Entomol* 91:293–320
- 521 Houghton CO (1909) Observations on the mating habits of *Oecanthus*. *Entomol*

- 522 News, 274–279
- 523 Lima SL, Dill LM (1990) Behavioral decisions made under the risk of predation: a  
524 review and prospectus. *Can J Zool* 68:619–640
- 525 Lohrey AK, Clark DL, Gordon SD, Uetz GW (2009). Antipredator responses of wolf  
526 spiders (Araneae: Lycosidae) to sensory cues representing an avian predator.  
527 *Anim Behav* 77:813–821
- 528 Magnhagen C (1991) Predation risk as a cost of reproduction. *TREE* 6:183–186.
- 529 Manly BFJ (2006) *Randomization, Bootstrap and Monte Carlo Methods in Biology*,  
530 3rd edn. Chapman and Hall/CRC, New York
- 531 McCartney J, Kokko H, Heller KG, Gwynne DT (2012). The evolution of sex  
532 differences in mate searching when females benefit: new theory and a  
533 comparative test. - *Proc R Soc Lond B Biol Sci* 279:1225-1232
- 534 Metrani S, Balakrishnan R (2005) The utility of song and morphological characters in  
535 delineating species boundaries among sympatric tree crickets of the genus  
536 *Oecanthus* (Orthoptera: Gryllidae: Oecanthinae): a numerical taxonomic  
537 approach. *J Orthop Res* 14:1–16
- 538 Nakagawa S, Cuthill IC (2007) Effect size, confidence interval and statistical  
539 significance: a practical guide for biologists. *Biol Rev Camb Philos Soc* 82:591–  
540 605
- 541 O'Neill KM, O'Neill RP (2003) Sex allocation, nests, and prey in the grass-carrying  
542 wasp *Isodontia mexicana* (Saussure) (Hymenoptera: Sphecidae) - *J Kans Entomol*  
543 *Soc* 76:447–454



- 544 Ponce-Wainer JX, Del Castillo RC (2008) Female mate choice and no detected  
545 predation risk in relation to the calling song of *Oecanthus niveus* (Gryllidae:  
546 Oecanthinae). *Ann Entomol Soc Am* 101:260–265
- 547 Raghuram H, Deb R, Nandi D, Balakrishnan R (2015) Silent katydid females are at  
548 higher risk of bat predation than acoustically signalling katydid males. *Proc R Soc*  
549 *Lond B Biol Sci* 282:20142319
- 550 Rodríguez-Muñoz R, Bretman A, Slate J, Walling CA, Tregenza T (2010) Natural  
551 and sexual selection in a wild insect population. *Science* 328:1269–1272
- 552 Ryan MJ, Tuttle MD, Rand SA (1982) Bat predation and sexual advertisement in a  
553 neotropical anuran. *Am Nat* 119:136–139
- 554 Shamble PS, Menda G, Golden JR, Nitzany EI, WaldenK, Beatus T, Elias DO, Cohen  
555 I, Miles RN, Hoy RR (2016) Airborne acoustic perception by a jumping spider.  
556 *Curr Biol* 26:2913-2920
- 557 Sih A (2005) Predator-prey space use as an emergent outcome of a behavioral  
558 response race. In: Barbosa P, Castellanos I (eds) *Ecology of predator-prey*  
559 *interactions*. Oxford University Press, New York, pp 240–255
- 560 Storm JJ, Lima SL (2010) Mothers forewarn offspring about predators: a  
561 transgenerational maternal effect on behavior. *Am Nat* 175:382–390
- 562 Tuttle MD, Ryan MJ (1981) Bat predation and the evolution of frog vocalizations in  
563 the neotropics. *Science* 214:677–678
- 564 Thornhill R (1979) Male and female sexual selection and the evolution of mating  
565 strategies in insects. In: Blum M, Blum N (eds) *Sexual selection and reproductive*

- 566 competition in insects, Academic Press, New York, pp 81–121
- 567 Trivers RL (1972) Sexual selection and parental investment. In: Campbell BG (ed)  
568 Sexual selection and the descent of man, Aldine Press, Chicago, pp 136–179
- 569 Walker TJJ (1957) Specificity in the response of female tree crickets (Orthoptera,  
570 Gryllidae, Oecanthinae) to calling songs of the males. *Ann Entomol Soc Am* 50:  
571 626-636
- 572 Walker TJJ (1964) Experimental demonstration of a cat locating orthopteran prey by  
573 the prey's calling song. *The Florida Entomol* 47:163–165
- 574 Wickham W (2009) *ggplot2: Elegant graphics for data analysis*. Springer-Verlag,  
575 New York
- 576 Zuk M, Kolluru GR (1998) Exploitation of sexual signals by predators and  
577 parasitoids. *Q Rev Biol* 73:415–438
- 578 Zuk M, Rotenberry JT, Tinghitella RM (2006) Silent night: adaptive disappearance of  
579 a sexual signal in a parasitized population of field crickets. *Biol Lett* 2:521-524

580 **Tables**

| <b>Treatments</b>         | <b>Probability of co-occurrence</b> | <b>Probability of encounter</b> | <b>Probability of being eaten</b> | <b>Predation risk</b> |
|---------------------------|-------------------------------------|---------------------------------|-----------------------------------|-----------------------|
| <b>Calling males</b>      | <b>0.2 (35)</b>                     | <b>0.211 (38)</b>               | <b>0.0 (18)</b>                   | <b>0.0 (91)</b>       |
| <b>Responding females</b> | <b>0.232 (13)</b>                   | <b>0.356 (45)</b>               | <b>0.04 (25)</b>                  | <b>0.0033 (83)</b>    |

581

582 **Table 1.** Probability values of calling males and responding females listed for 3  
583 different scales and the total predation risk. Values in parentheses are sample sizes.

584

585 **Figures**

586 **Fig. 1** Graphical representation of experimental design employed in the study to  
587 estimate predation risk. Each box represents a cricket interacting with its predator, a  
588 spider, at a particular spatial scale. Each arrow represents transition to the next spatial  
589 scale. Text above each box indicates what constituent of predation risk is studied and  
590 text below indicates how it was estimated. Probabilities from each spatial scale were  
591 multiplied to estimate predation risk.

592 **Fig. 2** Size distinction between *P. viridans* individuals that predated on *O. henryi* and  
593 the ones that did not. All spiders that captured crickets were larger than 5.12mm in  
594 body length.

595 **Fig. 3** Constituent probabilities of predation risk faced by *O. henryi* from its predator,  
596 *P. viridans*. Predation risk experienced by communicating crickets was partitioned  
597 into three spatial scales: probability of (a) co-occurrence, (b) encounter and (c) being  
598 eaten. Pairwise comparisons between calling males and responding females at the 3  
599 spatial scales are represented with associated *P* values. Values in parentheses are  
600 sample sizes.

601 **Fig. 4** Predation risk faced by *O. henryi* from its predator, *P. viridans*, as calling  
602 males and responding females. Probabilities are bootstrapped values represented as  
603 95% confidence intervals. Values in parentheses are sample sizes. Pairwise  
604 comparison is represented with associated *P* value.

Probability of  
co-occurrence

X

Probability of  
encounter

X

Probability of  
being eaten

=

Predation  
risk

Cricket present on the  
same bush as the spider

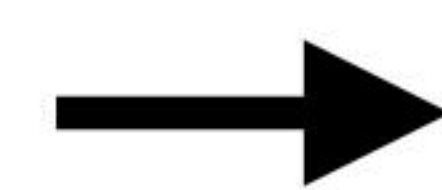

Cricket and/or spider  
move within close spatial  
proximity of each other

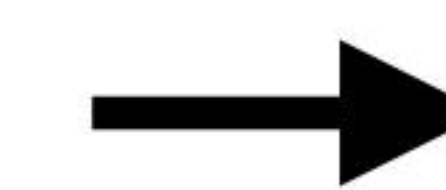

Cricket gets attacked and  
captured by spider

Field sampling

Manipulative experiments  
inside field enclosures

Manipulative experiments  
inside field enclosures

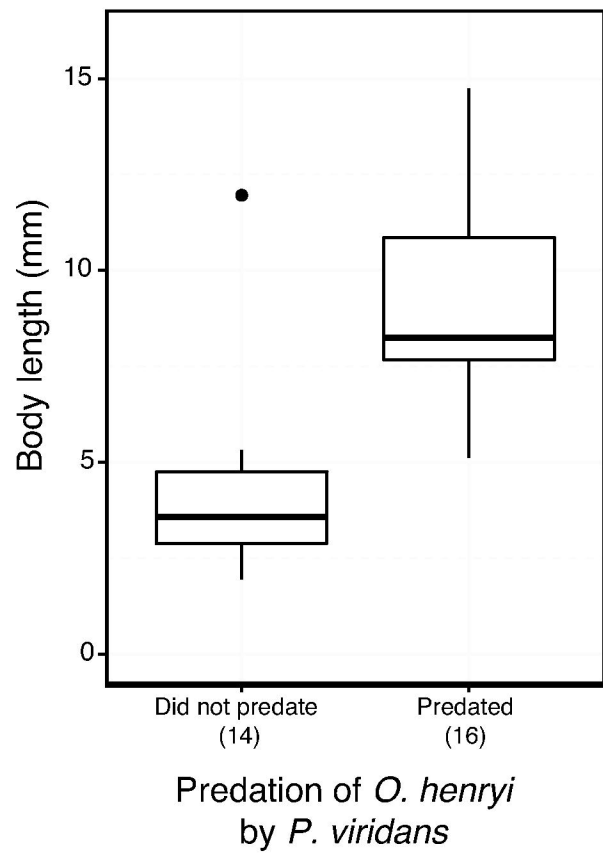

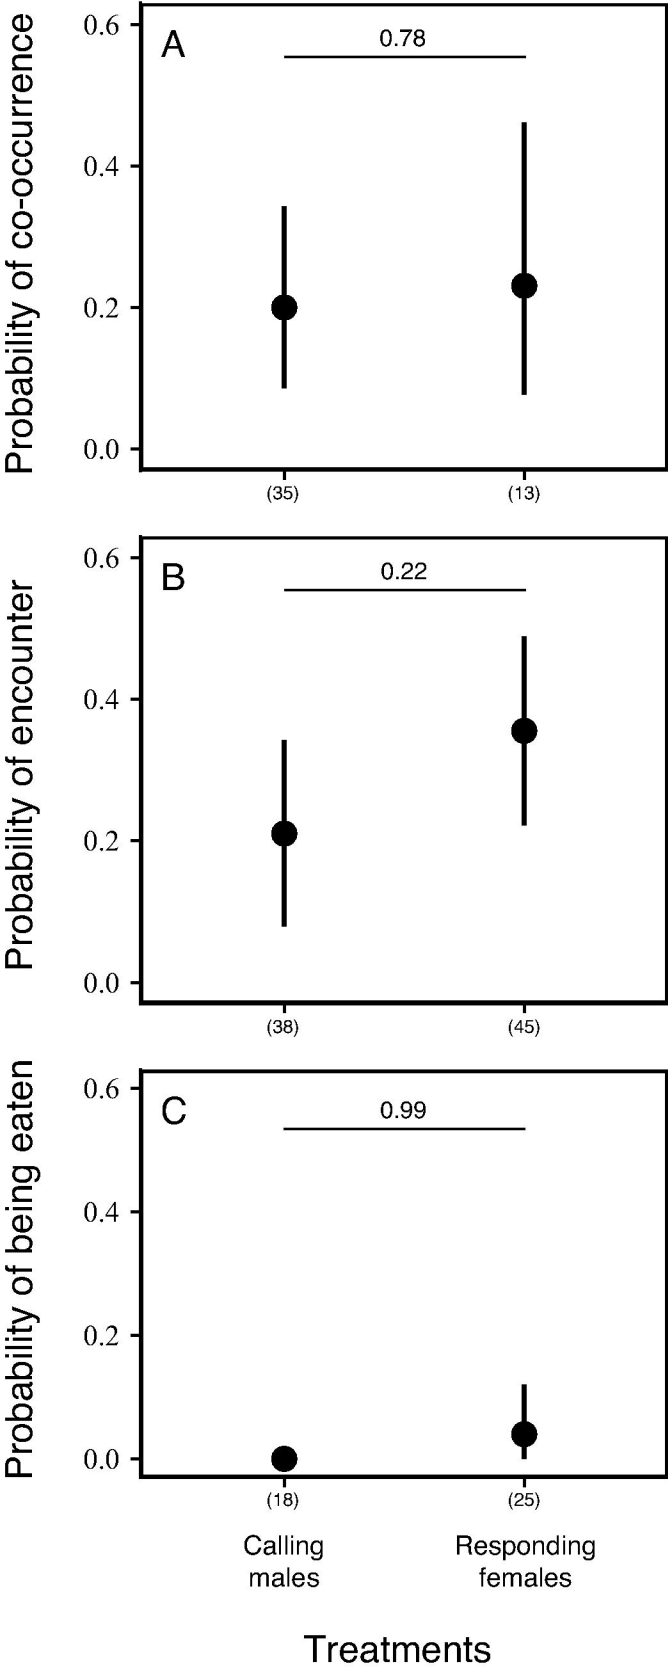

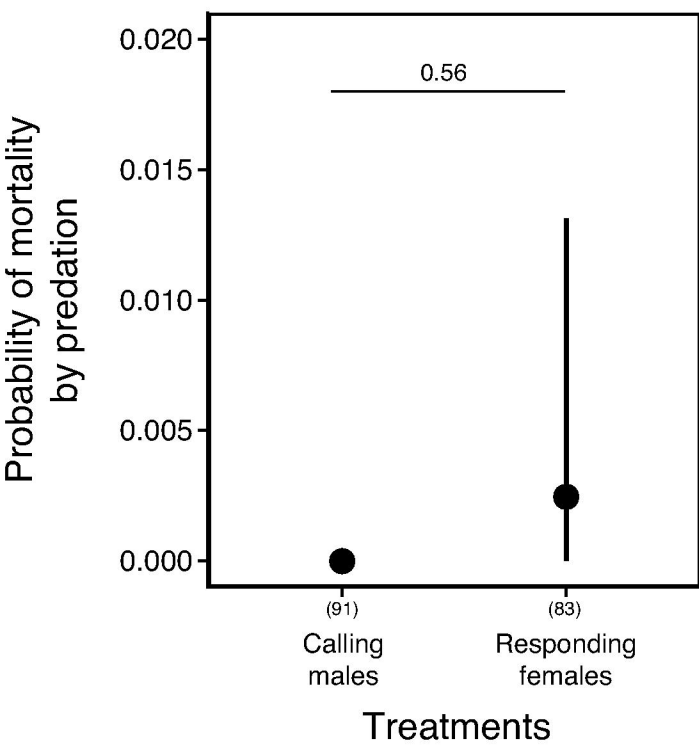

Source: https://www.biorxiv.org/content/10.1101/363507v2.full.pdf
